# Supplementary material for: Expedient synthesis of a symmetric cycloheptyne-Co2(CO)6 complex for orthogonal Huisgen cycloadditions
Source: Royal Society of Chemistry journal article supplement (doi:10.1039/c9qo00086k), 2019-01-01

# **Expedient Synthesis of a Symmetric Cycloheptyne- Co<sub>2</sub>(CO)<sub>6</sub> Complex for Orthogonal Huisgen Cycloadditions.**

## ***Supplementary Information***

Morgan Cormier, Eric Fouquet\* and Philippe Hermange\*

Univ. Bordeaux, Institut des Sciences Moléculaires, UMR-CNRS 5255, 351 Cours de la  
Libération, 33405 Talence Cedex, France.

E-mail: [philippe.hermange@u-bordeaux.fr](mailto:philippe.hermange@u-bordeaux.fr)

E-mail: [eric.fouquet@u-bordeaux.fr](mailto:eric.fouquet@u-bordeaux.fr)

|                              |          |
|------------------------------|----------|
| <b>General methods</b>       | <b>2</b> |
| <b>Procedures</b>            | <b>2</b> |
| <b>NMR and FT-IR spectra</b> | <b>8</b> |

## General methods

All commercial materials were used without further purification, unless indicated.  $^1\text{H}$  NMR and  $^{13}\text{C}$  NMR spectra were recorded on a BRUKER AVANCE I 300 Mhz ( $^1\text{H}$ : 300MHz,  $^{13}\text{C}$ : 75.3MHz), spectrometer. The chemical shifts for the NMR spectra are reported in ppm relative to the solvent residual peak. Coupling constants J are reported in hertz (Hz). The following abbreviations are used for the multiplicities: s, singlet; d, doublet; t, triplet; m, multiplet; dd, doublet of doublet; td, triplet of doublet. Yields refer to isolated material determined to be pure by NMR spectroscopy and thin-layer chromatography (TLC), unless specified in the text. Analytical TLCs were performed on Fluka Silica Gel 60 F254. Melting points were determined using a Stuart Scientific apparatus (SMP3). High resolution mass spectra were performed by the CESAMO (Talence, France) and were recorded on Qq-TOF tandem mass spectrometer (API Q-STAR Pulsari, Applied Biosystems). IR spectra were recorded on a Perkin Elmer Spectrum 100 FT-IR Spectrometer.

## Procedures

### 2,5-Dimethylhex-3-yne-2,5-diyl diacetate (5)

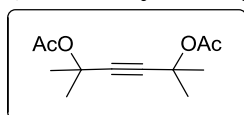

The product was prepared by using the modified procedure reported by Nevado *et al.*<sup>1</sup> To a solution of diol **4** (5 mmol, 710 mg, 1 equiv.) in dry dichloromethane under nitrogen ( $C = 0.1\text{ M}$ ), were added  $\text{Et}_3\text{N}$  (50 mmol, 6.9 mL, 10 equiv.), DMAP (5 mmol, 610mg, 1 equiv.) and then  $\text{Ac}_2\text{O}$  (25 mmol, 2.5 mL, 5 equiv.) at room temperature. The solution was stirred for 16 h at this temperature. After evaporation of volatiles under vacuum, the crude solution was directly poured into a silica column chromatography (petroleum ether/ $\text{Et}_2\text{O}$  7:3) to afford the compound **5** as a colorless liquid ( $m = 848\text{ mg}$ , yield = 75%). Analytical data was conformed to the literature.<sup>2</sup>  $^1\text{H}$  NMR (300 MHz,  $\text{CDCl}_3$ ):  $\delta$  [ppm] = 2.00 (s, 6H), 1.62 (s, 12H).

### (2-Methylenepropane-1,3-diyl)bis(trimethylsilane) (2c)

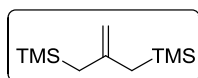

The product was prepared by using the modified procedure reported by Yus *et al.*<sup>3</sup> A solution of 3-chloro-2-chloromethylprop-1-ene (8 mmol, 1 mL, 1 equiv.) and  $\text{TMS-Cl}$  (16 mmol, 2 mL, 2 equiv.) in THF (5 mL) was added under nitrogen to a suspension of freshly cut lithium pieces (56 mmol, 400 mg, 7 equiv.) and naphthalene (0.8 mmol, 100 mg, 0.1 equiv.) in THF (10 mL) at  $-78^\circ\text{C}$ . The mixture was allowed to reach room temperature, while continuing the stirring for 24 h until a reddish solution appeared. Then, the mixture was quenched with water (10 mL), extracted with  $\text{Et}_2\text{O}$  (3 x 20 mL), and the organic phase was dried over anhydrous sodium sulfate. The crude bis-trimethylsilyl derivative **2c** was obtained and used without any further purification ( $m = 1.1\text{ g}$ , crude yield = 68%). Analytical data was conformed to the literature.<sup>3</sup>

$^1\text{H}$  NMR (300 MHz,  $\text{CDCl}_3$ ):  $\delta$  [ppm] = 4.39 (s, 2H), 1.49 (s, 4H), 0.05 (s, 18H).

<sup>1</sup> X. Huang, T. De Haro and C. Nevado, *Chem. Eur. J.*, 2009, **15**, 5904.

<sup>2</sup> D. R. Paulson, L. S. Gilliam, V. O. Terry, S. M. Farr, E. J. Parker, F. Y. N. Tang, R. Ullman and G. Ribar, *J. Org. Chem.*, 1978, **43**, 1783.

<sup>3</sup> E. Lorenzo, F. Alonso and M. Yus, *Tetrahedron*, 2000, **56**, 1745.

### Complex 1

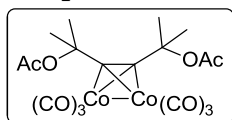

To a solution of **5** (1.2 mmol, 270 mg, 1 equiv.) in dry dichloromethane ( $C = 0.1$  M) under nitrogen was added  $\text{Co}_2\text{CO}_8$  (1.2 mmol, 450 mg, 1 equiv.) at room temperature. The solution was stirred for 4 h at this temperature, and then the solvent was removed under vacuum. The complex was then purified by flash chromatography on silica gel (petroleum ether/ $\text{Et}_2\text{O}$ , 8:2) to give **1** as a red solid ( $m = 660$  mg, yield = 99%). **Mp** ( $^\circ\text{C}$ ): 86–88. **Rf**: 0.62 (8:2 cyclohexane/ $\text{Et}_2\text{O}$ ).  **$^1\text{H}$  NMR** (300 MHz,  $\text{CDCl}_3$ ):  $\delta$  [ppm] = 2.01 (s, 6H), 1.93 (m, 12H).  **$^{13}\text{C}$  NMR** (75 MHz,  $\text{CDCl}_3$ ):  $\delta$  [ppm] = 170.0, 83.6, 28.9, 22.3. **HRMS**: Not detected after several trials (ESI, EI, FD). **FT-IR** ( $\text{v}/\text{cm}^{-1}$ , **KBr**): 2992, 2094, 2053, 2025, 1740, 1453, 1368, 1228, 1135, 1018, 937.

### Complex 3a

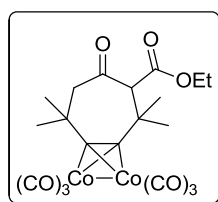

To a solution of **1** (1.2 mmol, 660 mg, 1 equiv.) in dry dichloromethane ( $C = 0.1$  M) under nitrogen was added the bis-silylenol ether **2a**<sup>4</sup> (1.2 mmol, 328 mg, 1 equiv.). The solution was cooled down to  $-40$   $^\circ\text{C}$  and  $\text{BF}_3 \cdot \text{OEt}_2$  (2.4 mmol, 0.72 mL, 2 equiv.,  $C = 46.5\%$ ) was added. The solution was stirred for 1 h at  $-40$   $^\circ\text{C}$ , and the solvent was removed under vacuum. The crude mixture was purified by flash chromatography on silica gel (petroleum ether/ $\text{Et}_2\text{O}$ , 9:1) to give **3a** as a red solid ( $m = 190$  mg, yield = 30%). **Rf**: 0.46 (9:1 petroleum ether/ $\text{Et}_2\text{O}$ ).  **$^1\text{H}$  NMR** (300 MHz,  $\text{CDCl}_3$ ):  $\delta$  [ppm] = 4.25 – 4.10 (m, 2H), 3.71 (s, 1H), 2.87 (d,  $J = 10.9$  Hz, 1H), 2.63 (d,  $J = 10.9$  Hz, 1H), 2.17 (s, 3H), 1.45 (s, 3H), 1.43 (s, 3H), 1.40 (s, 3H), 1.28 (s, 3H), 1.24 (t,  $J = 7.1$  Hz, 3H).  **$^{13}\text{C}$  NMR** (75 MHz,  $\text{CDCl}_3$ ):  $\delta$  [ppm] = 203.9, 167.2, 77.6, 77.2, 76.7, 67.4, 61.1, 59.4, 40.0, 37.8, 33.1, 31.8, 30.7, 27.5, 14.2. **HRMS (ESI)**  $\text{C}_{20}\text{H}_{20}\text{Co}_2\text{O}_9$  calculated for  $[\text{M} + \text{Na}]$ : 544.9663 found 544.9678. **FT-IR** ( $\text{v}/\text{cm}^{-1}$ , **KBr**): 2968, 2933, 2091, 2049, 2023, 1751, 1706, 1463, 1323, 1164, 1119.

### Complex 3b

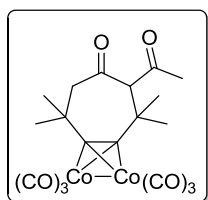

To a solution of **1** (1.2 mmol, 660 mg, 1 equiv.) in dry dichloromethane ( $C = 0.1$  M) under nitrogen, was added the bis-silylenol ether **2b**<sup>4</sup> (1.2 mmol, 293 mg, 1 equiv.). The solution was cooled down to  $-40$   $^\circ\text{C}$  and  $\text{BF}_3 \cdot \text{OEt}_2$  (2.4 mmol, 0.72 mL, 2 equiv.,  $C = 46.5\%$ ). The solution was stirred for 1 h at  $-40$   $^\circ\text{C}$ , and the solvent was removed under vacuum. The crude mixture was purified by flash chromatography on silica gel (petroleum ether/ $\text{Et}_2\text{O}$ , 9:1) to give to give **3b** as a red solid ( $m = 176$  mg, yield = 30%). **Rf**: 0.35 (9:1 petroleum ether / $\text{Et}_2\text{O}$ ).  **$^1\text{H}$  NMR** (300 MHz,  $\text{CDCl}_3$ ):  $\delta$  [ppm] = 3.89 (s, 1H), 2.92 (d,  $J = 10.7$  Hz, 1H), 2.66 (d,  $J = 10.7$  Hz, 1H), 2.13 (s, 3H), 1.42 (s, 3H), 1.41 (s, 3H), 1.39 (s, 3H), 1.28 (s, 3H).  **$^{13}\text{C}$  NMR** (75 MHz,  $\text{CDCl}_3$ ):  $\delta$  [ppm] = 205.3, 201.0, 74.4, 59.8, 40.6, 38.1, 33.2,

<sup>4</sup> Prepared following this procedure : G. A. Molander and K. O. Cameron, *J. Am. Chem. Soc.*, 1993, **115**, 830.

32.3, 31.8, 30.6, 27.4 . **HRMS (ESI)**  $C_{19}H_{18}Co_2O_8$  calculated for  $[M+Na]$ : 514.9557 found 514.9563. **FT-IR ( $\nu/cm^{-1}$ , KBr)**: 2986, 2970, 2936, 2090, 2041, 2016, 1731, 1693, 1575, 1453, 1360, 1317, 1158, 1126, 1069, 995.

### Complex 3c

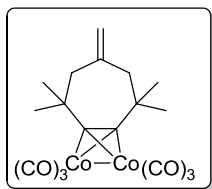

To a solution of **1** (1.2 mmol, 660 mg, 1 equiv.) in dry dichloromethane ( $C = 0.1$  M) under nitrogen was added the bis-allylsilane **2c** (1.2 mmol, 240 mg, 1 equiv.). The solution was cooled down to  $-40$  °C and  $BF_3 \cdot OEt_2$  (2.4 mmol, 0.72 mL, 2 equiv.,  $C = 46.5\%$ ). The solution was stirred for 1 h at  $-40$  °C, and the solvent was removed under vacuum. The crude mixture was purified by flash chromatography on silica gel (petroleum ether pure) to give **3c** as a red pasty solid ( $m = 245$  mg, yield = 45%). **R<sub>f</sub>**: 0.71 (petroleum ether pure).  **$^1H$  NMR** (300 MHz,  $CDCl_3$ ):  $\delta$  [ppm] = 4.96 (s, 2H), 2.28 (s, 4H), 1.27 (s, 12H).  **$^{13}C$  NMR** (75 MHz,  $CDCl_3$ ):  $\delta$  [ppm] = 143.9, 118.8, 52.6, 37.9, 32.1. **HRMS**: Not detected after several trials (ESI, EI, FD). **FT-IR ( $\nu/cm^{-1}$ , KBr)**: 2960, 2087, 2045, 2020, 1862, 1453, 1379, 1247, 836.

### Complex 6

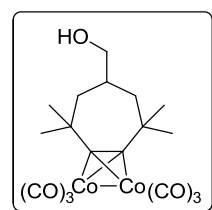

To a solution of **3c** (0.5 mmol, 227 mg, 1 equiv.) in dry THF ( $C = 0.1$  M) under nitrogen was added  $BH_3 \cdot THF$  (0.75 mmol, 0.75 mL, 1.5 equiv.,  $C = 1$  M in THF) at  $0$  °C. The solution was stirred at r.t. until full conversion of the starting material (16 h, TLC monitoring), then  $NaBO_3 \cdot 4H_2O$  (2.5 mmol, 382 mg, 5 equiv.) in a water suspension (2 mL) was added to the mixture at r.t. The solution was vigorously stirred for 4 h at r.t. (biphasic mixture). Then, the mixture was quenched with water (10 mL), extracted with EtOAc (3 x 10 mL), and the combined organic phases were dried over anhydrous sodium sulfate and evaporated under reduced pressure. The residue was purified by flash chromatography on silica gel (petroleum ether/ $Et_2O$ , 8:2) to give **6** as a red pasty solid ( $m = 142$  mg, yield = 60%). **R<sub>f</sub>**: 0.25 (7:3 cyclohexane/ $AcOEt$ ).  **$^1H$  NMR** (300 MHz,  $CDCl_3$ ):  $\delta$  [ppm] = 3.45 (t,  $J = 6.1$  Hz, 2H), 2.13-1.96 (m, 1H), 1.79 (d,  $J = 13.5$  Hz, 2H), 1.34 (d,  $J = 13.3$  Hz, 2H), 1.29 (s, 12H).  **$^{13}C$  NMR** (75 MHz,  $CDCl_3$ ):  $\delta$  [ppm] = 69.1, 46.9, 37.9, 35.6, 33.8, 31.9. **HRMS**: Not detected after several trials (ESI, EI, FD). **FT-IR ( $\nu/cm^{-1}$ , KBr)**: 3371, 2994, 2929, 2086, 2043, 2019, 1591, 1469, 1379, 1362, 1248, 858, 837.

### Complex 7

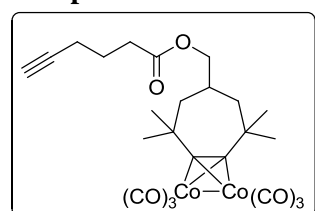

To a solution of **6** (0.3 mmol, 141 mg, 1 equiv.) in dry dichloromethane ( $C = 0.1\text{ M}$ ) under nitrogen, was added 5-hexynoic acyl chloride (0.45 mmol, 59 mg, 1.5 equiv.) and  $\text{Et}_3\text{N}$  (0.3 mmol, 41  $\mu\text{L}$ , 1 equiv.) at room temperature. The solution was stirred at r.t. until full conversion of the starting material (1 h, TLC monitoring). After evaporation of volatiles under vacuum, the residue was directly purified by silica column chromatography (petroleum ether/ $\text{Et}_2\text{O}$  8:2) to afford compound **7** as a red pasty solid ( $m = 86\text{ mg}$ , yield = 51%). **R<sub>f</sub>**: 0.44 (8:2 petroleum ether/ $\text{Et}_2\text{O}$ ). **<sup>1</sup>H NMR** (300 MHz,  $\text{CDCl}_3$ ):  $\delta$  [ppm] = 3.94 (d,  $J = 6.4\text{ Hz}$ , 2H), 2.50 (t,  $J = 7.4\text{ Hz}$ , 2H), 2.30 (td,  $J = 6.9, 2.6\text{ Hz}$ , 2H), 2.00 (t,  $J = 2.6\text{ Hz}$ , 1H), 1.94 – 1.83 (m, 2H), 1.74 (d,  $J = 13.0\text{ Hz}$ , 2H), 1.47 – 1.39 (m, 2H), 1.32 (s, 12H). **<sup>13</sup>C NMR** (75 MHz,  $\text{CDCl}_3$ ):  $\delta$  [ppm] = 173.0, 109.9, 70.1, 69.2, 46.8, 37.7, 33.6, 32.9, 32.2, 31.7, 23.6, 17.9. **HRMS**: Not detected after several trials (ESI, EI, FD). **FT-IR** ( $\text{v}/\text{cm}^{-1}$ , **KBr**): 3313, 2966, 2937, 2086, 2044, 2019, 1737, 1591, 1469, 1451, 1381, 1363, 1157, 858.

### Click-product 8a

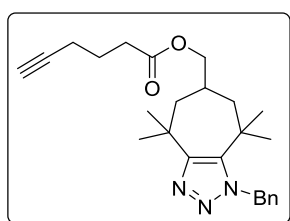

To a solution of complex **7** (0.107 mmol, 60 mg, 1 equiv.) and  $\text{BnN}_3$  (0.22 mmol, 30 mg, 2 equiv.) in  $\text{CH}_3\text{CN}$  ( $C = 0.05\text{ M}$ ) under nitrogen was added TMANO (0.55 mmol, 41 mg, 5 equiv.) at  $0^\circ\text{C}$ . The solution was stirred at r.t. for 16 h, the mixture becoming black. Then, the mixture was quenched with water (10 mL), extracted with  $\text{EtOAc}$  (3 x 10 mL), and the combined organic phases were dried over anhydrous sodium sulfate and evaporated under reduced pressure. The crude was purified by flash chromatography on silica gel (petroleum ether/ $\text{Et}_2\text{O}$ , 8:2) to give **8a** as a colorless oil ( $m = 18\text{ mg}$ , yield = 41%). **R<sub>f</sub>**: 0.33 (9:1 cyclohexane/ $\text{AcOEt}$ ). **<sup>1</sup>H NMR** (300 MHz,  $\text{CDCl}_3$ ):  $\delta$  [ppm] = 7.35-7.28 (m, 3H), 7.03-6.98 (m, 2H), 5.72 (s, 2H), 3.98-3.87 (m, 2H), 2.48 (t,  $J = 7.4\text{ Hz}$ , 1H), 2.27 (td,  $J = 6.9, 2.7\text{ Hz}$ , 2H), 2.23-2.16 (m, 1H), 1.97 (t,  $J = 2.6\text{ Hz}$ , 1H), 1.91-1.79 (m, 2H), 1.74-1.63 (m, 2H), 1.61 (s, 3H), 1.58-1.45 (m, 2H), 1.34 (s, 3H), 1.28 (s, 3H), 1.03 (s, 3H). **<sup>13</sup>C NMR** (75 MHz,  $\text{CDCl}_3$ ):  $\delta$  [ppm] = 173.2, 150.9, 138.3, 136.9, 128.9, 127.9, 126.5, 83.3, 69.9, 69.4, 54.5, 49.4, 45.9, 35.0, 33.8, 33.0, 31.9, 31.6, 31.2, 31.1, 27.7, 23.8, 18.0. **HRMS (ESI)**  $\text{C}_{25}\text{H}_{33}\text{N}_3\text{O}_2$  calculated for  $[\text{M}+\text{Na}]$ : 430.2464 found 430.2470.

### Click-product 8b

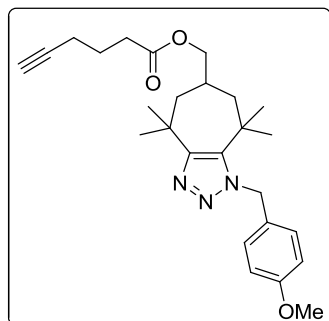

To a solution of complex **7** (0.107 mmol, 60 mg, 1 equiv.) and  $p\text{MeOC}_6\text{H}_4\text{CH}_2\text{N}_3$  (0.22 mmol, 36 mg, 2 equiv.) in  $\text{CH}_3\text{CN}$  ( $C = 0.05\text{ M}$ ) under nitrogen was added TMANO (0.55 mmol, 41 mg, 5 equiv.) at  $0^\circ\text{C}$ . The solution was stirred at r.t. for 16 h, the mixture becoming black. Then, the mixture was quenched with water (10 mL), extracted with  $\text{EtOAc}$  (3 x 10 mL), and the combined organic phases

were dried over anhydrous sodium sulfate and evaporated under reduced pressure. The crude was purified by flash chromatography on silica gel (petroleum ether/Et<sub>2</sub>O, 8:2) to give **8b** as a colorless oil (m = 21 mg, yield = 45%). **R<sub>f</sub>**: 0.29 (8:2 petroleum ether/AcOEt). **<sup>1</sup>H NMR** (300 MHz, CDCl<sub>3</sub>): δ [ppm] = 6.96 (d, *J* = 8.8 Hz, 2H), 6.84 (d, *J* = 8.8 Hz, 2H), 5.74-5.58 (m, 2H), 3.92 (dd, *J* = 6.7, 3.6 Hz, 2H), 3.79 (s, 3H), 2.48 (t, *J* = 7.4 Hz, 2H), 2.27 (td, *J* = 6.9, 2.7 Hz, 2H), 2.24-2.17 (m, 1H), 1.97 (t, *J* = 2.7 Hz, 1H), 1.88-1.81 (m, 2H), 1.73-1.61 (m, 2H), 1.60 (s, 3H), 1.54-1.45 (m, 2H), 1.36 (s, 3H), 1.27 (s, 3H), 1.02 (s, 3H). **<sup>13</sup>C NMR** (75 MHz, CDCl<sub>3</sub>): δ [ppm] = 173.2, 159.3, 150.9, 138.2, 128.8, 127.9, 114.3, 83.3, 69.9, 69.4, 55.4, 54.1, 49.4, 45.9, 34.9, 33.8, 33.0, 31.9, 31.6, 31.2, 27.7, 23.8, 18.0, 1.2. **HRMS (ESI)** C<sub>26</sub>H<sub>35</sub>N<sub>3</sub>O<sub>3</sub> calculated for [M+Na]: 460.2570 found 460.2574.

### Click-product 9a

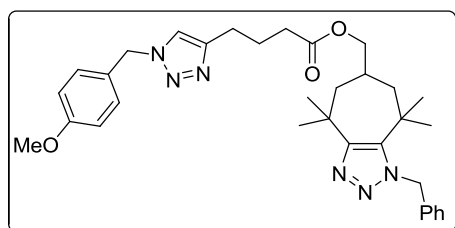

To a solution of **8a** (0.022 mmol, 9 mg, 1 equiv.) and *p*MeOC<sub>6</sub>H<sub>4</sub>CH<sub>2</sub>N<sub>3</sub> (0.026 mmol, 4.3 mg, 1.2 equiv.) in *t*BuOH/H<sub>2</sub>O (3:1, C = 0.05 M) under nitrogen was added CuSO<sub>4</sub> (2.6 μmol, 0.4 mg, 0.1 equiv.) and sodium ascorbate (0.026 mmol, 5.2 mg, 1 equiv.). The solution was stirred at r.t. for 16 h. Then, the mixture was quenched with water (10 mL), extracted with EtOAc (3 x 10 mL), and the combined organic phases were dried over anhydrous sodium sulfate and evaporated under reduced pressure. The crude was purified by flash chromatography on silica gel (dichloromethane/MeOH, 95:5) to give **9a** as a colorless oil (m = 8 mg, yield = 64%). **R<sub>f</sub>**: 0.59 (95:5 dichloromethane/MeOH). **<sup>1</sup>H NMR** (300 MHz, CDCl<sub>3</sub>): δ [ppm] = 7.36-7.28 (m, 3H), 7.23-7.13 (m, 3H), 7.03-6.96 (m, 2H), 6.91-6.85 (m, 2H), 5.71 (s, 2H), 5.41 (s, 2H), 3.92-3.87 (m, 2H), 3.80 (s, 3H), 2.72 (t, *J* = 7.5 Hz, 2H), 2.38 (t, *J* = 7.5 Hz, 2H), 2.26-2.16 (m, 1H), 2.04-1.91 (m, 2H), 1.67 (d, *J* = 13.6 Hz, 2H), 1.60 (s, 3H), 1.56-1.45 (m, 2H), 1.32 (s, 3H), 1.26 (s, 3H), 1.01 (s, 3H). **<sup>13</sup>C NMR** (75 MHz, CDCl<sub>3</sub>): δ [ppm] = 173.4, 160.0, 150.9, 147.6, 138.4, 136.9, 129.7, 128.9, 127.9, 126.9, 126.5, 120.6, 114.6, 69.8, 55.5, 54.5, 53.8, 49.3, 45.9, 34.9, 33.8, 33.7, 31.9, 31.6, 31.2, 31.1, 27.7, 25.2, 24.8. **HRMS (ESI)** C<sub>33</sub>H<sub>42</sub>N<sub>6</sub>O<sub>3</sub>Na calculated for [M+Na]: 593.3210 found 593.3201.

### Click-product 9b

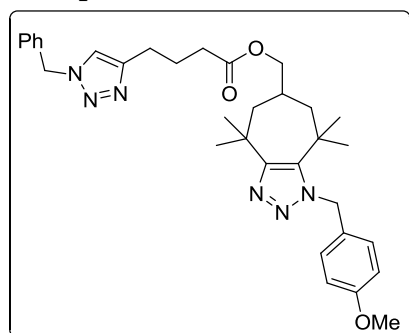

#### Via sequence B

To a solution of **8b** (0.085 mmol, 37 mg, 1 equiv.) and BnN<sub>3</sub> (0.11 mmol, 15 mg, 1.3 equiv.) in *t*BuOH/H<sub>2</sub>O (3:1, C = 0.05 M) under nitrogen was added CuSO<sub>4</sub> (0.01 mmol, 1.5 mg, 0.1 equiv.) and sodium ascorbate (0.085 mmol, 17 mg, 1 equiv.). The solution was stirred at r.t. for 16 h. Then, the mixture was quenched with water (10 mL), extracted with EtOAc (3 x 10 mL), and the combined organic phases were dried over anhydrous sodium sulfate and evaporated under reduced pressure. The

crude was purified by flash chromatography on silica gel (dichloromethane/MeOH, 95:5) to give **9b** as a colorless oil (m = 20 mg, yield = 41%).

#### Via sequence C

To a solution of complex **10** (0.028 mmol, 20 mg, 1 equiv.) and *p*MeOC<sub>6</sub>H<sub>4</sub>CH<sub>2</sub>N<sub>3</sub> (0.56 mmol, 10 mg, 2 equiv.) in CH<sub>3</sub>CN (C = 0.05 M) under nitrogen was added TMANO (0.28 mmol, 21 mg, 10 equiv.) at 0°C. The solution was stirred at r.t. for 16 h, the mixture becoming black. Then, the mixture was quenched with water (10 mL), extracted with EtOAc (3 x 10 mL), and the combined organic phases were dried over anhydrous sodium sulfate and evaporated under reduced pressure. The crude was purified by flash chromatography on silica gel (dichloromethane/MeOH, 95:5) to give **9b** as a colorless oil (m = 10 mg, yield = 63%)

**Rf**: 0.61 (95:5 dichloromethane /MeOH). **<sup>1</sup>H NMR** (300 MHz, CDCl<sub>3</sub>): δ [ppm] = 7.39-7.33 (m, 3H), 7.25-7.21 (m, 2H), 7.21 (s, 1H), 6.96 (d, *J* = 8.8 Hz, 2H), 6.84 (d, *J* = 8.8 Hz, 2H), 5.73-5.56 (m, 2H), 5.49 (s, 2H), 3.96-3.85 (m, 2H), 3.78 (s, 3H), 2.74 (t, *J* = 7.6 Hz, 2H), 2.39 (t, *J* = 7.5 Hz, 2H), 2.25-2.15 (m, 1H), 2.02-1.94 (m, 2H), 1.67 (d, *J* = 13.5 Hz, 2H), 1.59 (s, 3H), 1.49 (d, *J* = 13.6 Hz, 2H), 1.35 (s, 3H), 1.25 (s, 3H), 1.00 (s, 3H). **<sup>13</sup>C NMR** (75 MHz, CDCl<sub>3</sub>): δ [ppm] = 173.3, 159.2, 150.6, 143.4, 141.4, 138.1, 134.8, 129.1, 128.7, 128.0, 127.7, 120.7, 114.2, 69.7, 55.3, 54.1, 53.9, 49.2, 45.7, 34.9, 33.7, 33.6, 31.8, 31.5, 31.1, 31.0, 27.6, 25.1, 24.7. **HRMS (ESI)** C<sub>33</sub>H<sub>42</sub>N<sub>6</sub>O<sub>3</sub> calculated for [M+Na]: 593.3210 found 593.3214.

### Complex 10

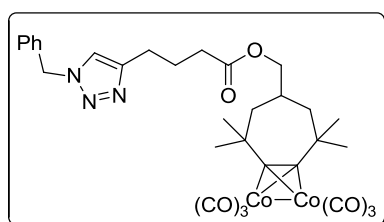

To a solution of complex **7** (0.089 mmol, 50 mg, 1 equiv.) and BnN<sub>3</sub> (0.11 mmol, 15 mg, 1.3 equiv.) in *t*BuOH/H<sub>2</sub>O (3:1, C = 0.05 M) under nitrogen was added the CuSO<sub>4</sub> (0.009 mmol, 1.5 mg, 0.1 equiv.) and sodium ascorbate (0.089 mmol, 17 mg, 1 equiv.). The solution was stirred at r.t. for 16 h. Then, the mixture was quenched with water (10 mL), extracted with EtOAc (3 x 10 mL), and the combined organic phases were dried over anhydrous sodium sulfate and evaporated under reduced pressure. The crude was purified by flash chromatography on silica gel (petroleum ether/Et<sub>2</sub>O, 8:2) to give **10** as a red pasty solid (m = 32 mg, yield = 54%). **Rf**: 0.5 (6:4 petroleum ether/AcOEt). **<sup>1</sup>H NMR** (300 MHz, CDCl<sub>3</sub>): δ [ppm] = 7.42-7.34 (m, 3H), 7.31-7.23 (m, 2H), 7.21 (s, 1H), 5.49 (s, 2H), 3.88 (d, *J* = 6.4 Hz, 2H), 2.75 (t, *J* = 7.6 Hz, 2H), 2.39 (t, *J* = 7.4 Hz, 2H), 2.25-2.11 (m, 1H), 2.07-1.92 (m, 2H), 1.70 (d, *J* = 13.7 Hz, 2H), 1.39 (d, *J* = 13.6 Hz, 2H), 1.27 (s, 12H). **<sup>13</sup>C NMR** (75 MHz, CDCl<sub>3</sub>): δ [ppm] = 173.4, 147.8, 134.9, 129.2, 128.8, 128.2, 120.8, 110.0, 70.2, 54.2, 46.9, 37.8, 33.7, 33.6, 32.3, 31.9, 25.2, 24.7. **HRMS (ESI)** C<sub>31</sub>H<sub>33</sub>Co<sub>2</sub>N<sub>3</sub>O<sub>8</sub> calculated for [M+]: 693.0932 found 693.0935. **FT-IR** (ν/cm<sup>-1</sup>, KBr): 2965, 2935, 2086, 2043, 2018, 1734, 1591, 1455, 1380, 1362, 1176, 1050, 858.

### <sup>1</sup>H, <sup>13</sup>C NMR and IR spectra

mc325.p1

1H.rout CDCl3 Z:\\ CSH-EF 8

 $^1\text{H}$ , 300 MHz,  $\text{CDCl}_3$ 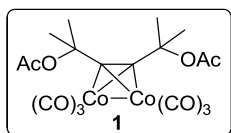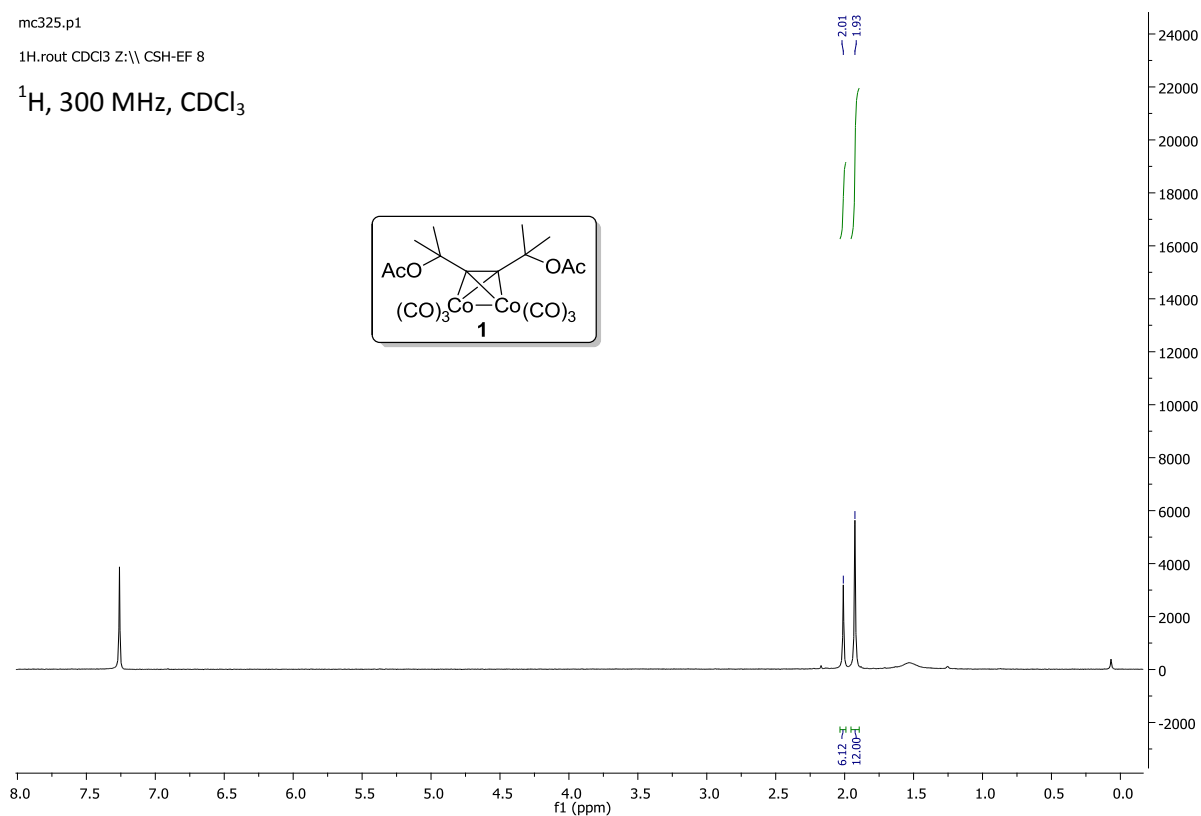

mc341.p113c

13C.rout CDCl3 Z:\\ CSH-16 EF 9

 $^{13}\text{C}$ , 75 MHz,  $\text{CDCl}_3$ 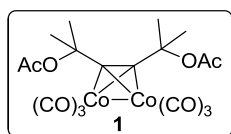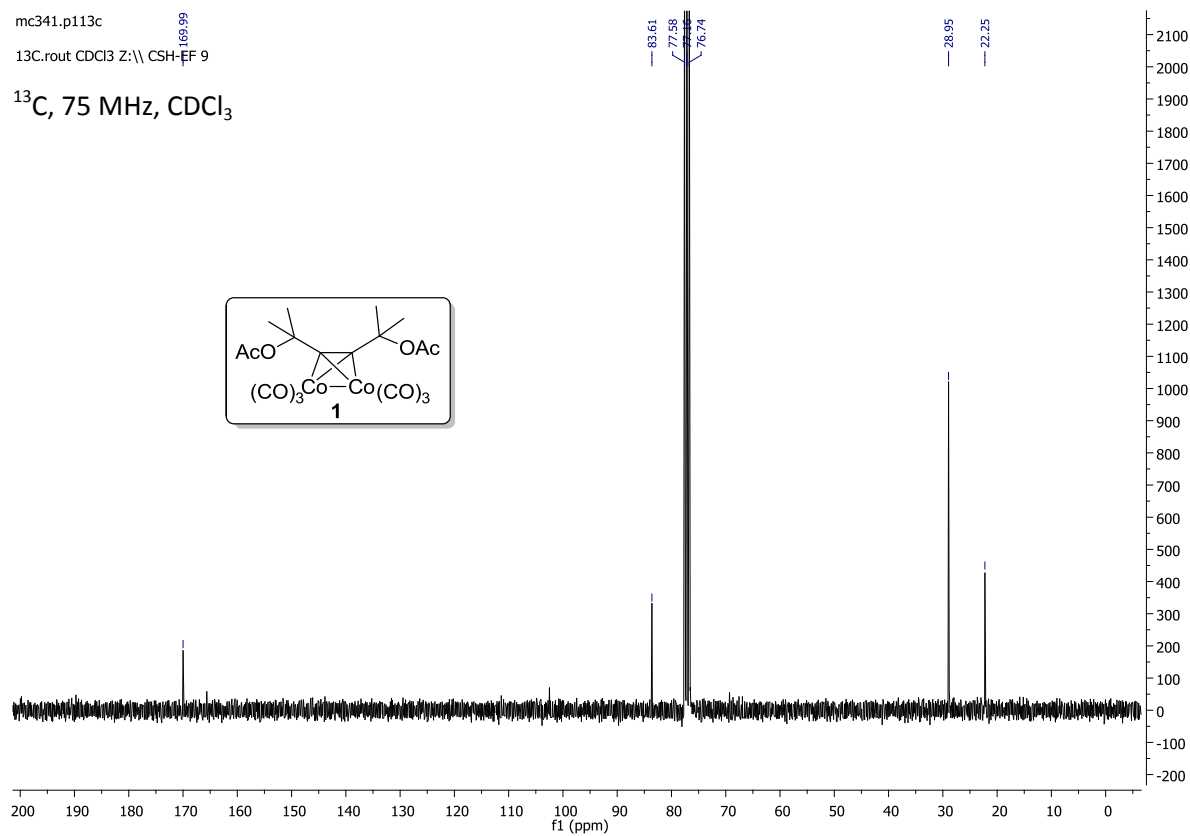



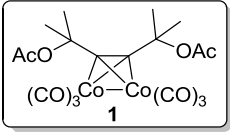

mc054.p3

1H.rout CDCl3 Z:\\ CSH-EF 35

$^1\text{H}$ , 300 MHz,  $\text{CDCl}_3$

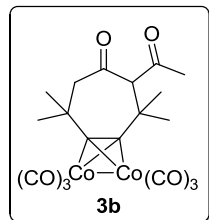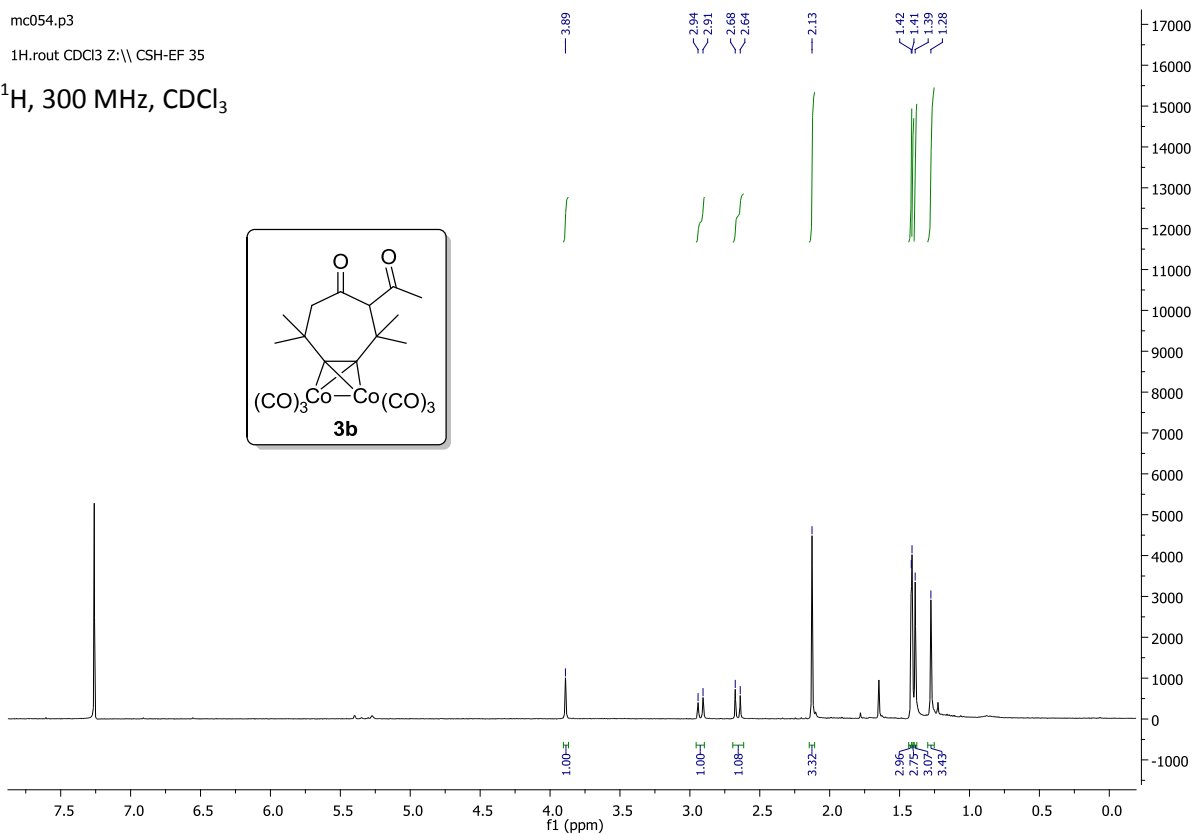

mc103.p3 22.13c

$^{13}\text{C}$ .rout CDCl3 Z:\\ CSH-EF 34

$^{13}\text{C}$ , 75 MHz,  $\text{CDCl}_3$

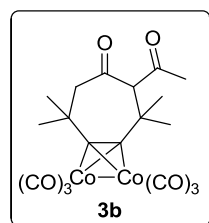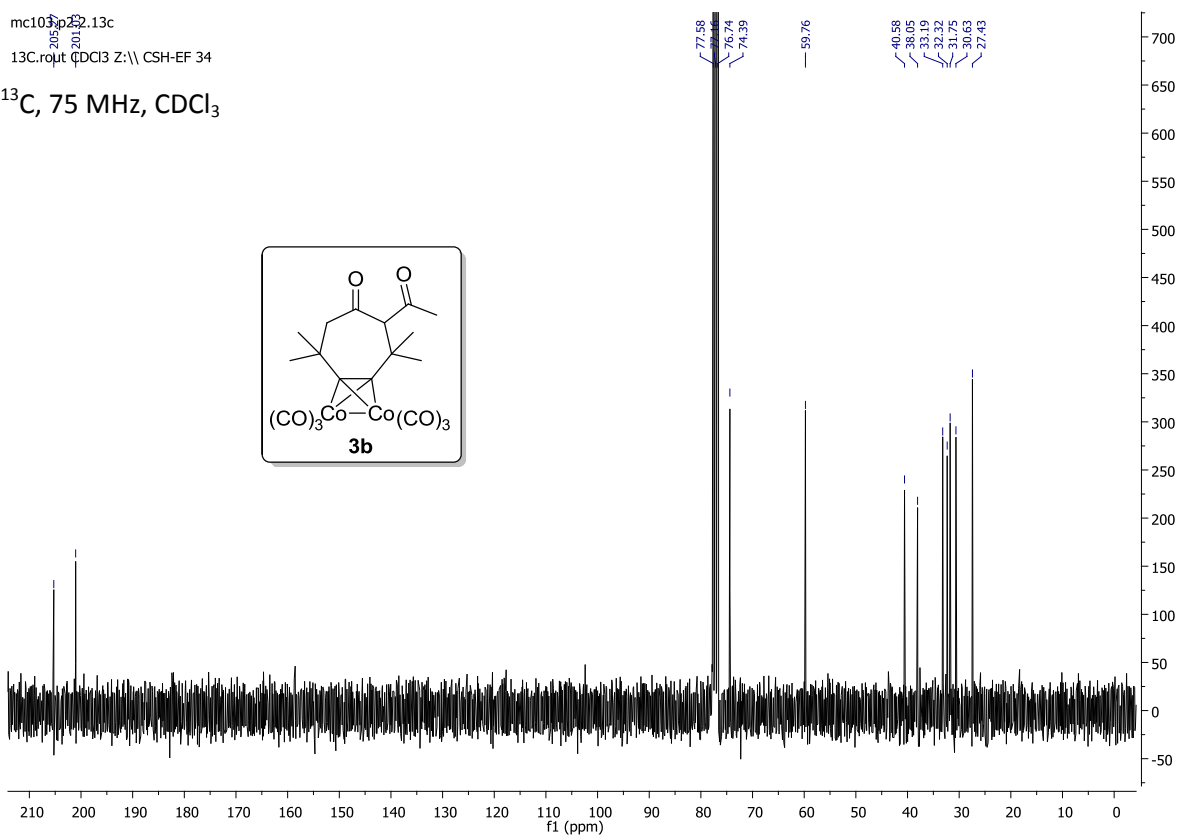

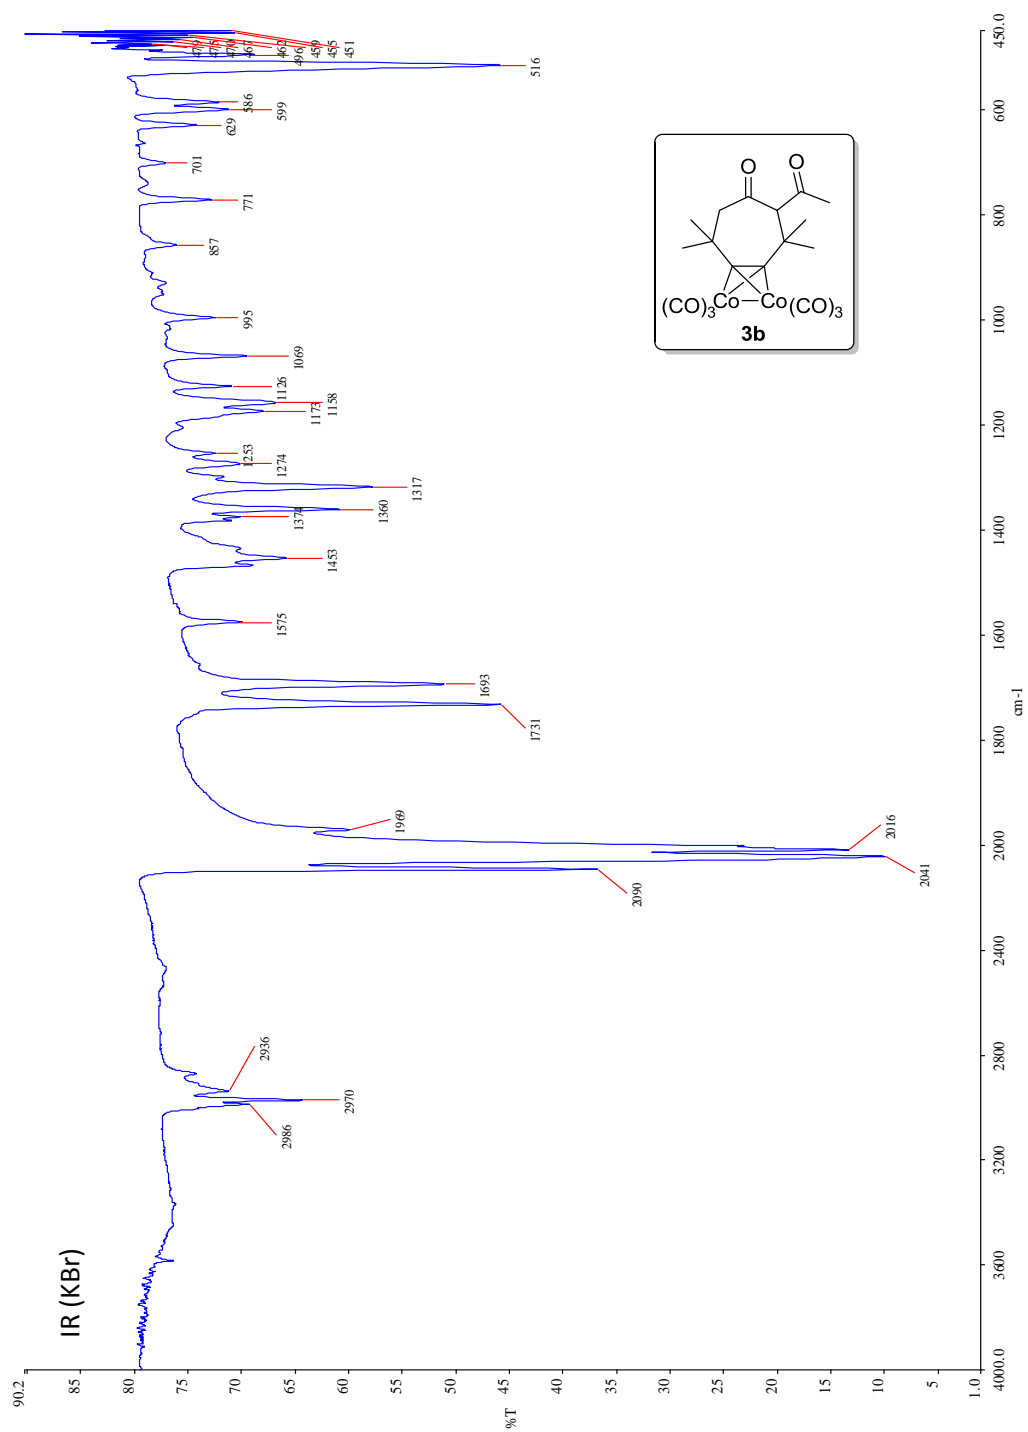

1H.rout CDCl3 Z:\ CSH-EF 38

mc116.p  
1H.rout CDCl3 Z:\CSH-EF 38

<sup>1</sup>H, 300 MHz, CDCl<sub>3</sub>

Chemical structure of **3a** is shown in the inset:

CCOC(=O)C1(C)C(C(C1)C2(C)C(C2)C3(C)C(C3)C(=O)C4(C)C(C4)C(=O)C5(C)C(C5)C(=O)C6(C)C(C6)C(=O)C7(C)C(C7)C(=O)C8(C)C(C8)C(=O)C9(C)C(C9)C(=O)C10(C)C(C10)C(=O)C11(C)C(C11)C(=O)C12(C)C(C12)C(=O)C13(C)C(C13)C(=O)C14(C)C(C14)C(=O)C15(C)C(C15)C(=O)C16(C)C(C16)C(=O)C17(C)C(C17)C(=O)C18(C)C(C18)C(=O)C19(C)C(C19)C(=O)C20(C)C(C20)C(=O)C21(C)C(C21)C(=O)C22(C)C(C22)C(=O)C23(C)C(C23)C(=O)C24(C)C(C24)C(=O)C25(C)C(C25)C(=O)C26(C)C(C26)C(=O)C27(C)C(C27)C(=O)C28(C)C(C28)C(=O)C29(C)C(C29)C(=O)C30(C)C(C30)C(=O)C31(C)C(C31)C(=O)C32(C)C(C32)C(=O)C33(C)C(C33)C(=O)C34(C)C(C34)C(=O)C35(C)C(C35)C(=O)C36(C)C(C36)C(=O)C37(C)C(C37)C(=O)C38(C)C(C38)C(=O)C39(C)C(C39)C(=O)C40(C)C(C40)C(=O)C41(C)C(C41)C(=O)C42(C)C(C42)C(=O)C43(C)C(C43)C(=O)C44(C)C(C44)C(=O)C45(C)C(C45)C(=O)C46(C)C(C46)C(=O)C47(C)C(C47)C(=O)C48(C)C(C48)C(=O)C49(C)C(C49)C(=O)C50(C)C(C50)C(=O)C51(C)C(C51)C(=O)C52(C)C(C52)C(=O)C53(C)C(C53)C(=O)C54(C)C(C54)C(=O)C55(C)C(C55)C(=O)C56(C)C(C56)C(=O)C57(C)C(C57)C(=O)C58(C)C(C58)C(=O)C59(C)C(C59)C(=O)C60(C)C(C60)C(=O)C61(C)C(C61)C(=O)C62(C)C(C62)C(=O)C63(C)C(C63)C(=O)C64(C)C(C64)C(=O)C65(C)C(C65)C(=O)C66(C)C(C66)C(=O)C67(C)C(C67)C(=O)C68(C)C(C68)C(=O)C69(C)C(C69)C(=O)C70(C)C(C70)C(=O)C71(C)C(C71)C(=O)C72(C)C(C72)C(=O)C73(C)C(C73)C(=O)C74(C)C(C74)C(=O)C75(C)C(C75)C(=O)C76(C)C(C76)C(=O)C77(C)C(C77)C(=O)C78(C)C(C78)C(=O)C79(C)C(C79)C(=O)C80(C)C(C80)C(=O)C81(C)C(C81)C(=O)C82(C)C(C82)C(=O)C83(C)C(C83)C(=O)C84(C)C(C84)C(=O)C85(C)C(C85)C(=O)C86(C)C(C86)C(=O)C87(C)C(C87)C(=O)C88(C)C(C88)C(=O)C89(C)C(C89)C(=O)C90(C)C(C90)C(=O)C91(C)C(C91)C(=O)C92(C)C(C92)C(=O)C93(C)C(C93)C(=O)C94(C)C(C94)C(=O)C95(C)C(C95)C(=O)C96(C)C(C96)C(=O)C97(C)C(C97)C(=O)C98(C)C(C98)C(=O)C99(C)C(C99)C(=O)C100(C)C(C100)C(=O)C101(C)C(C101)C(=O)C102(C)C(C102)C(=O)C103(C)C(C103)C(=O)C104(C)C(C104)C(=O)C105(C)C(C105)C(=O)C106(C)C(C106)C(=O)C107(C)C(C107)C(=O)C108(C)C(C108)C(=O)C109(C)C(C109)C(=O)C110(C)C(C110)C(=O)C111(C)C(C111)C(=O)C112(C)C(C112)C(=O)C113(C)C(C113)C(=O)C114(C)C(C114)C(=O)C115(C)C(C115)C(=O)C116(C)C(C116)C(=O)C117(C)C(C117)C(=O)C118(C)C(C118)C(=O)C119(C)C(C119)C(=O)C120(C)C(C120)C(=O)C121(C)C(C121)C(=O)C122(C)C(C122)C(=O)C123(C)C(C123)C(=O)C124(C)C(C124)C(=O)C125(C)C(C125)C(=O)C126(C)C(C126)C(=O)C127(C)C(C127)C(=O)C128(C)C(C128)C(=O)C129(C)C(C129)C(=O)C130(C)C(C130)C(=O)C131(C)C(C131)C(=O)C132(C)C(C132)C(=O)C133(C)C(C133)C(=O)C134(C)C(C134)C(=O)C135(C)C(C135)C(=O)C136(C)C(C136)C(=O)C137(C)C(C137)C(=O)C138(C)C(C138)C(=O)C139(C)C(C139)C(=O)C140(C)C(C140)C(=O)C141(C)C(C141)C(=O)C142(C)C(C142)C(=O)C143(C)C(C143)C(=O)C144(C)C(C144)C(=O)C145(C)C(C145)C(=O)C146(C)C(C146)C(=O)C147(C)C(C147)C(=O)C148(C)C(C148)C(=O)C149(C)C(C149)C(=O)C150(C)C(C150)C(=O)C151(C)C(C151)C(=O)C152(C)C(C152)C(=O)C153(C)C(C153)C(=O)C154(C)C(C154)C(=O)C155(C)C(C155)C(=O)C156(C)C(C156)C(=O)C157(C)C(C157)C(=O)C158(C)C(C158)C(=O)C159(C)C(C159)C(=O)C160(C)C(C160)C(=O)C161(C)C(C161)C(=O)C162(C)C(C162)C(=O)C163(C)C(C163)C(=O)C164(C)C(C164)C(=O)C165(C)C(C165)C(=O)C166(C)C(C166)C(=O)C167(C)C(C167)C(=O)C168(C)C(C168)C(=O)C169(C)C(C169)C(=O)C170(C)C(C170)C(=O)C171(C)C(C171)C(=O)C172(C)C(C172)C(=O)C173(C)C(C173)C(=O)C174(C)C(C174)C(=O)C175(C)C(C175)C(=O)C176(C)C(C176)C(=O)C177(C)C(C177)C(=O)C178(C)C(C178)C(=O)C179(C)C(C179)C(=O)C180(C)C(C180)C(=O)C181(C)C(C181)C(=O)C182(C)C(C182)C(=O)C183(C)C(C183)C(=O)C184(C)C(C184)C(=O)C185(C)C(C185)C(=O)C186(C)C(C186)C(=O)C187(C)C(C187)C(=O)C188(C)C(C188)C(=O)C189(C)C(C189)C(=O)C190(C)C(C190)C(=O)C191(C)C(C191)C(=O)C192(C)C(C192)C(=O)C193(C)C(C193)C(=O)C194(C)C(C194)C(=O)C195(C)C(C195)C(=O)C196(C)C(C196)C(=O)C197(C)C(C197)C(=O)C198(C)C(C198)C(=O)C199(C)C(C199)C(=O)C200(C)C(C200)C(=O)C201(C)C(C201)C(=O)C202(C)C(C202)C(=O)C203(C)C(C203)C(=O)C204(C)C(C204)C(=O)C205(C)C(C205)C(=O)C206(C)C(C206)C(=O)C207(C)C(C207)C(=O)C208(C)C(C208)C(=O)C209(C)C(C209)C(=O)C210(C)C(C210)C(=O)C211(C)C(C211)C(=O)C212(C)C(C212)C(=O)C213(C)C(C213)C(=O)C214(C)C(C214)C(=O)C215(C)C(C215)C(=O)C216(C)C(C216)C(=O)C217(C)C(C217)C(=O)C218(C)C(C218)C(=O)C219(C)C(C219)C(=O)C220(C)C(C220)C(=O)C221(C)C(C221)C(=O)C222(C)C(C222)C(=O)C223(C)C(C223)C(=O)C224(C)C(C224)C(=O)C225(C)C(C225)C(=O)C226(C)C(C226)C(=O)C227(C)C(C227)C(=O)C228(C)C(C228)C(=O)C229(C)C(C229)C(=O)C230(C)C(C230)C(=O)C231(C)C(C231)C(=O)C232(C)C(C232)C(=O)C233(C)C(C233)C(=O)C234(C

13C-rout CDCl<sub>3</sub> Z:\\ CSH-EF 14

mc118p13c  
13C.rout CDCl3 Z:\\ CSH-EF 14

$^{13}\text{C}$ , 75 MHz,  $\text{CDCl}_3$

**3a**

208.16  
167.22  
77.58  
77.44  
76.74  
67.43  
61.12  
59.42  
40.04  
37.82  
33.14  
31.77  
30.68  
27.49  
14.21

f1 (ppm)



mc200.p2

1H.rout CDCl3 Z:\\ CSH-EF 19

$^1\text{H}$ , 300 MHz,  $\text{CDCl}_3$

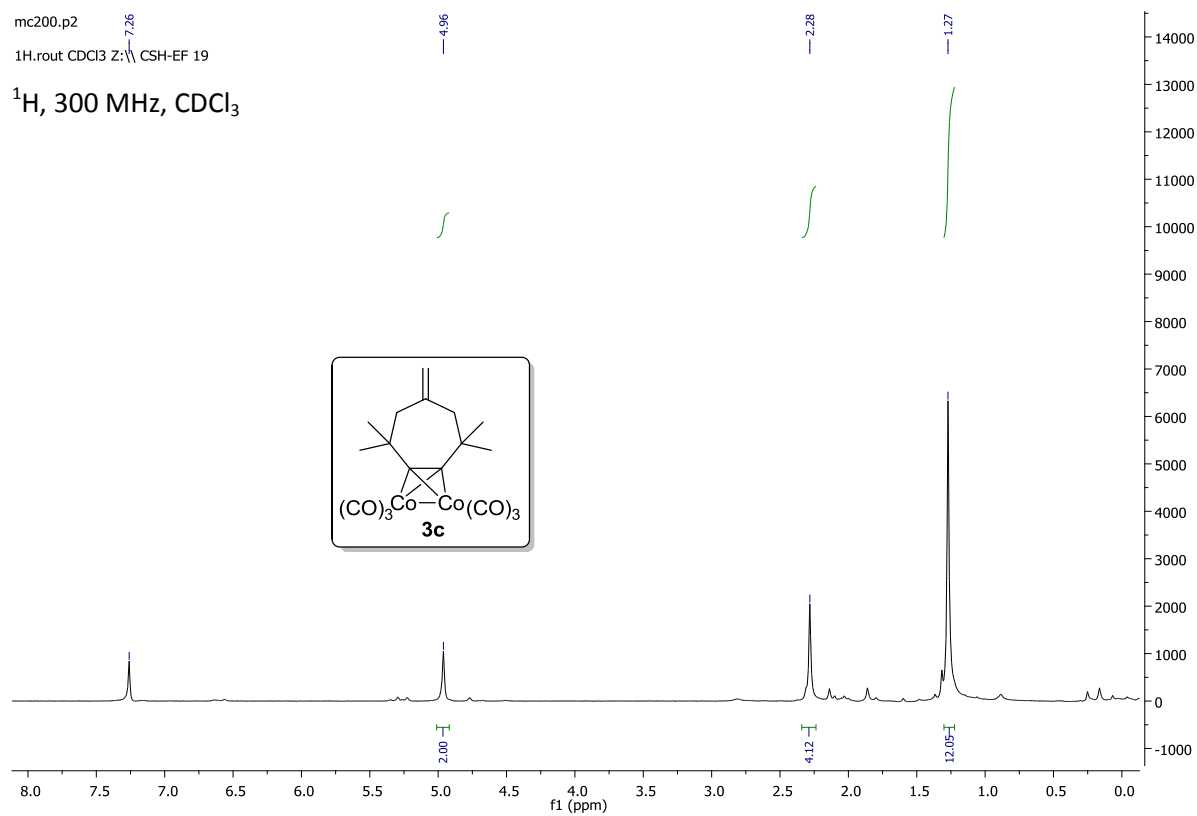

mc200.p13c

13C.rout CDCl3 Z:\\ CSH-EF 24

$^{13}\text{C}$ , 75 MHz,  $\text{CDCl}_3$

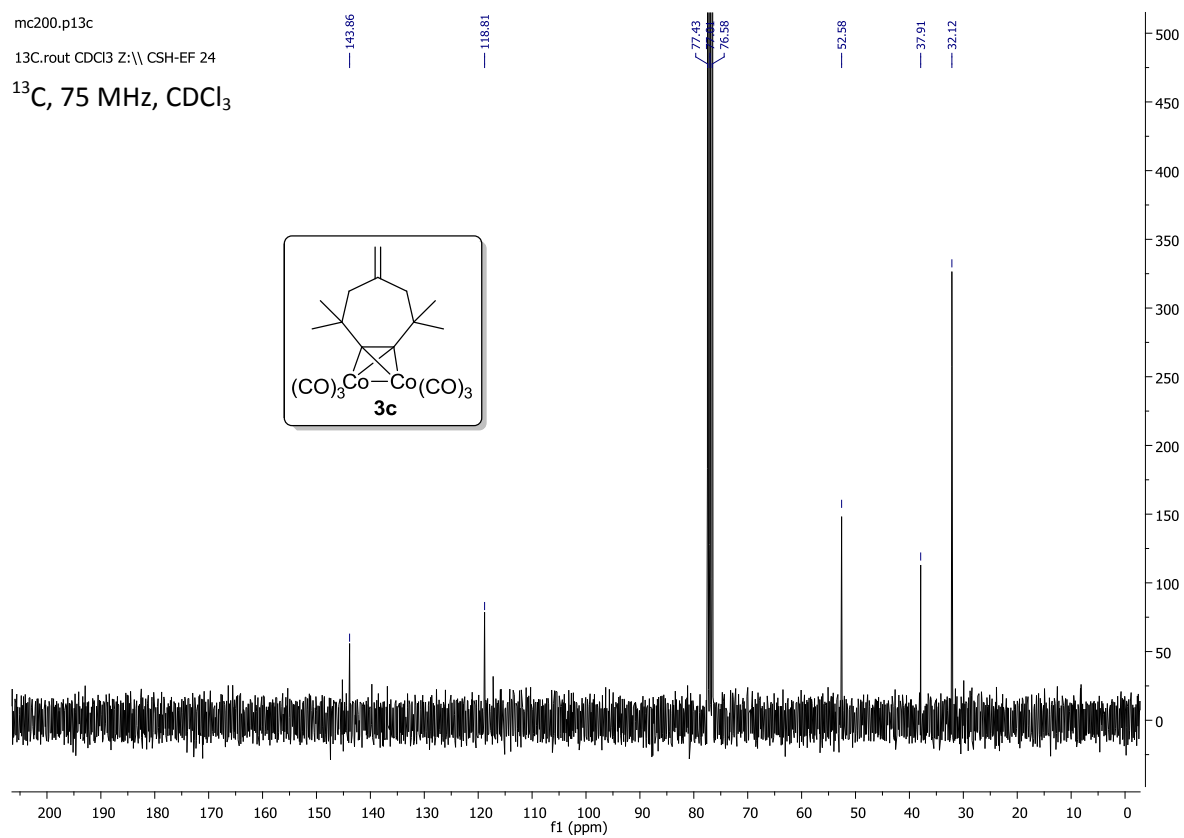



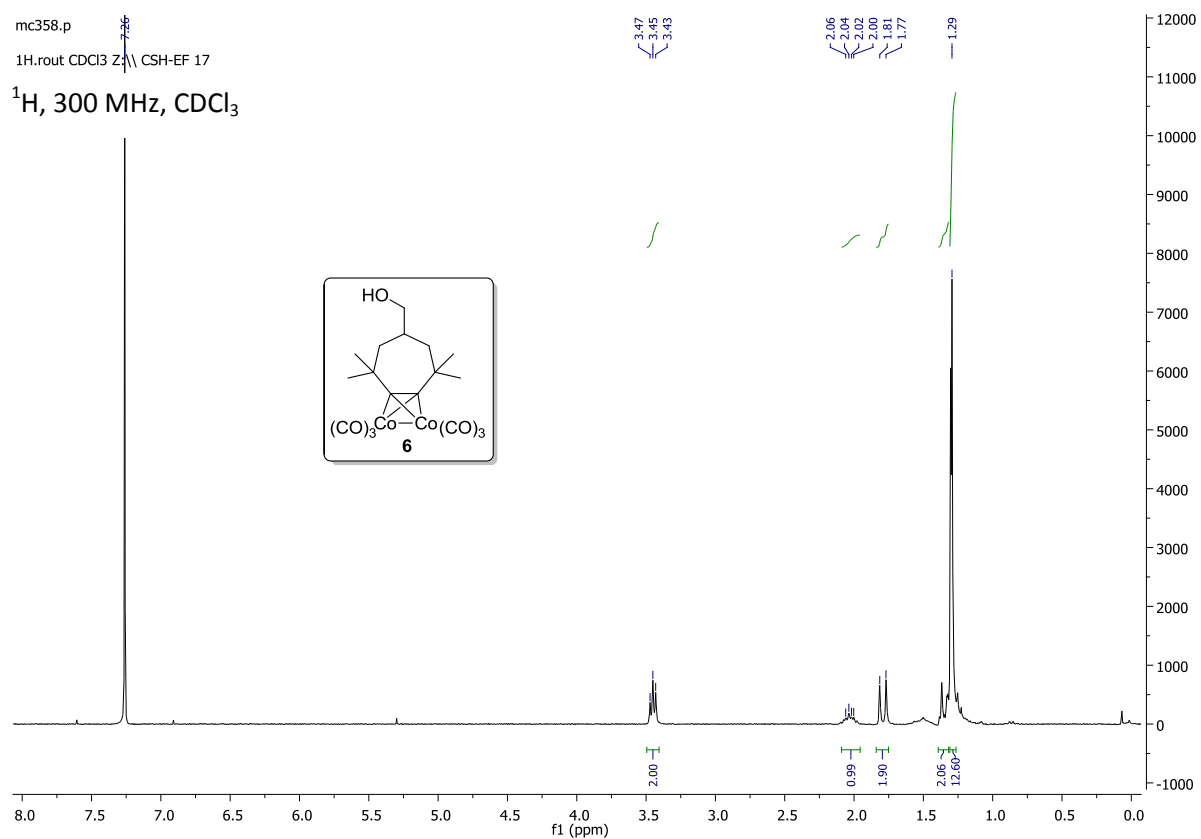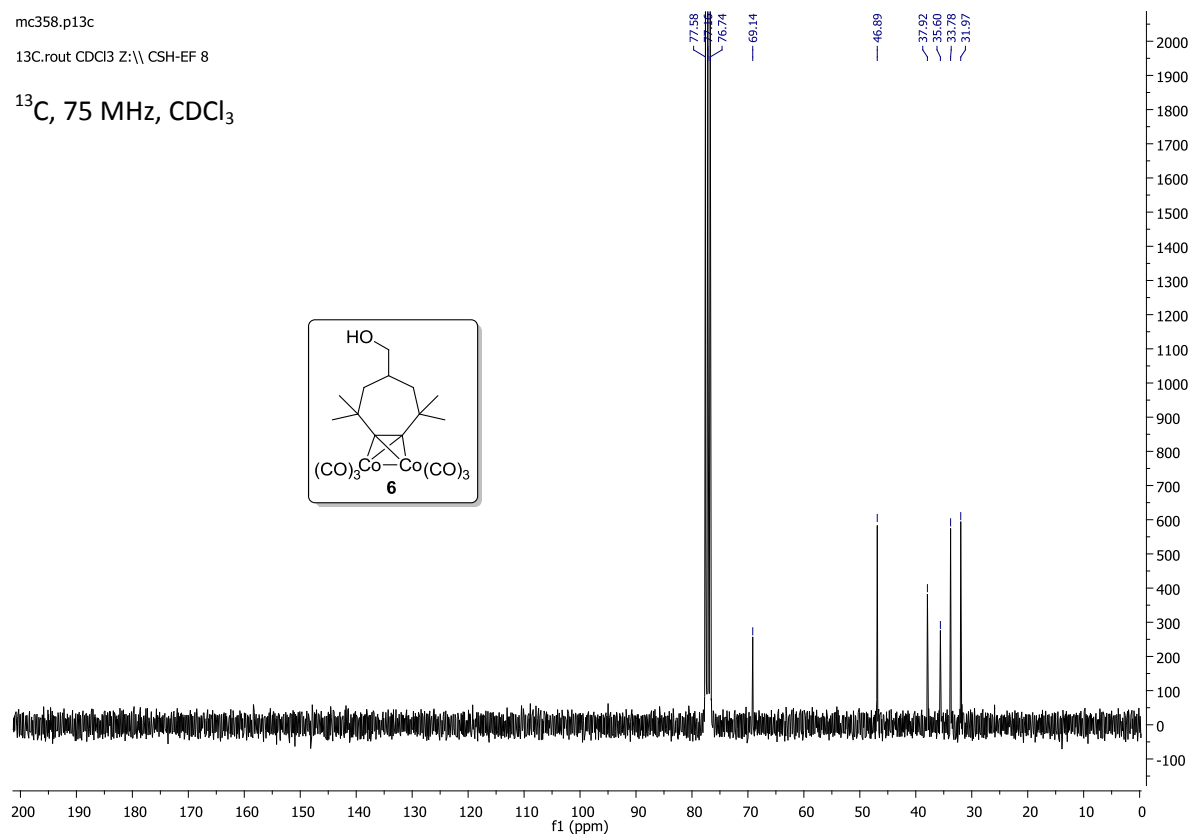



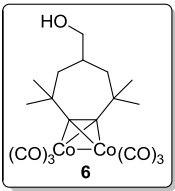

$^1\text{H}$ , 300 MHz,  $\text{CDCl}_3$ 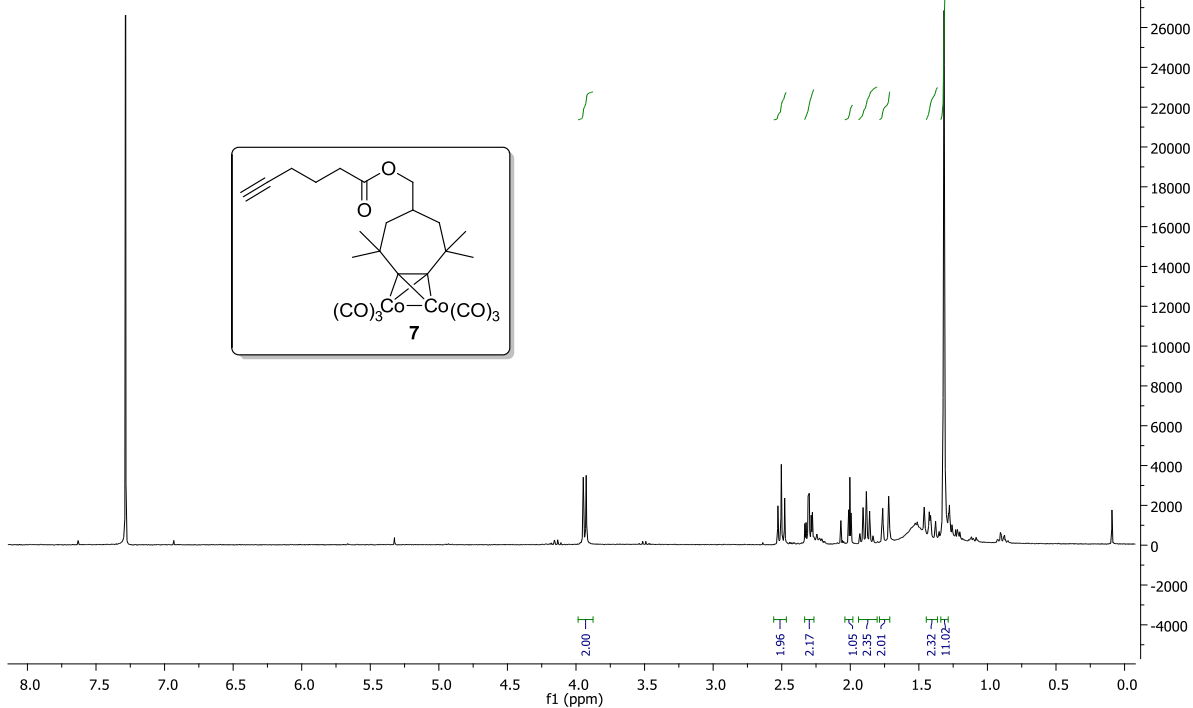

13C.rout CDCl3 Z:\\ CSH-EF 56

<sup>13</sup>C, 75 MHz, CDCl<sub>3</sub>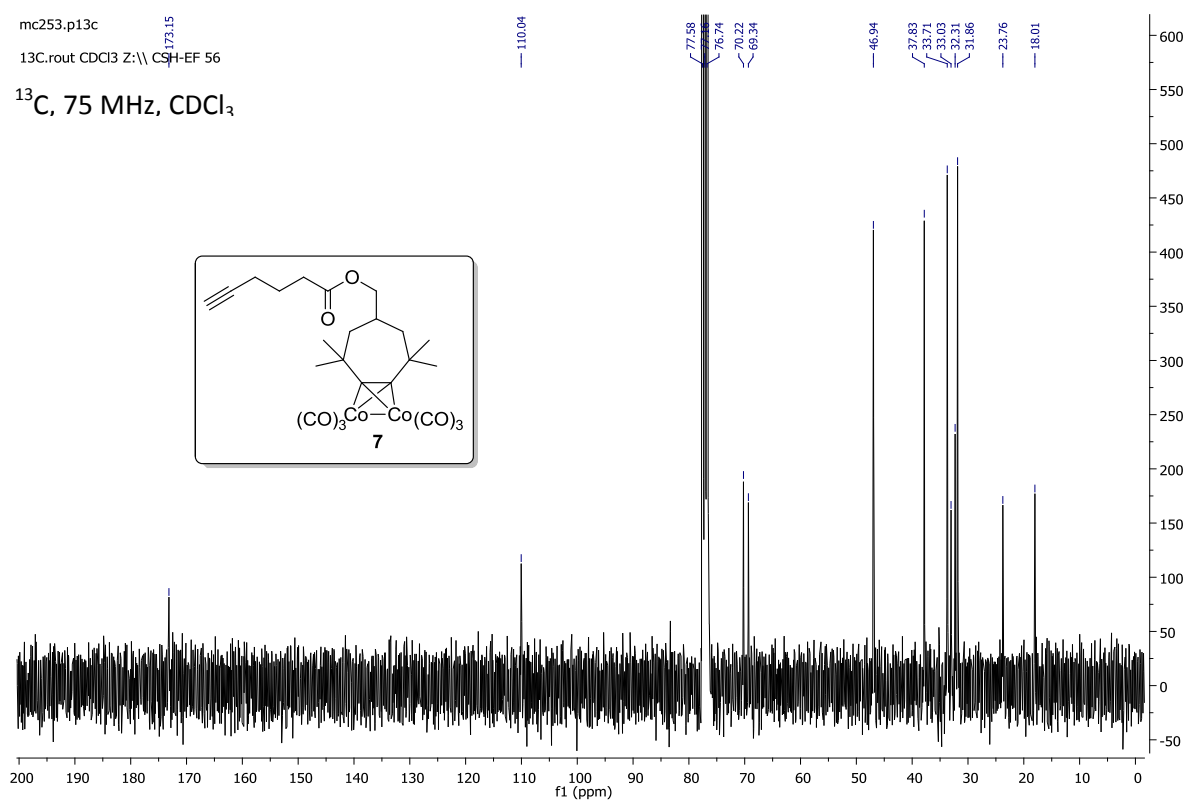

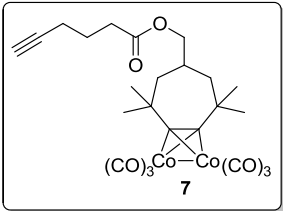

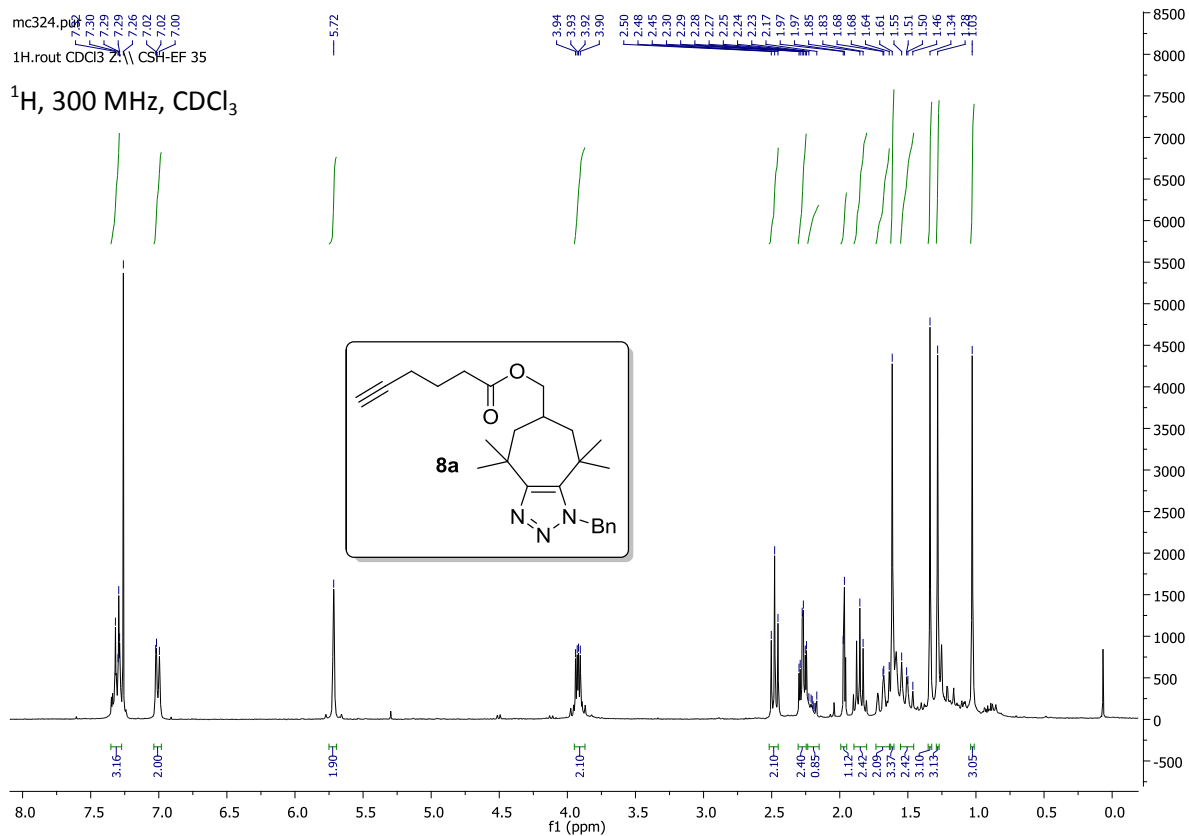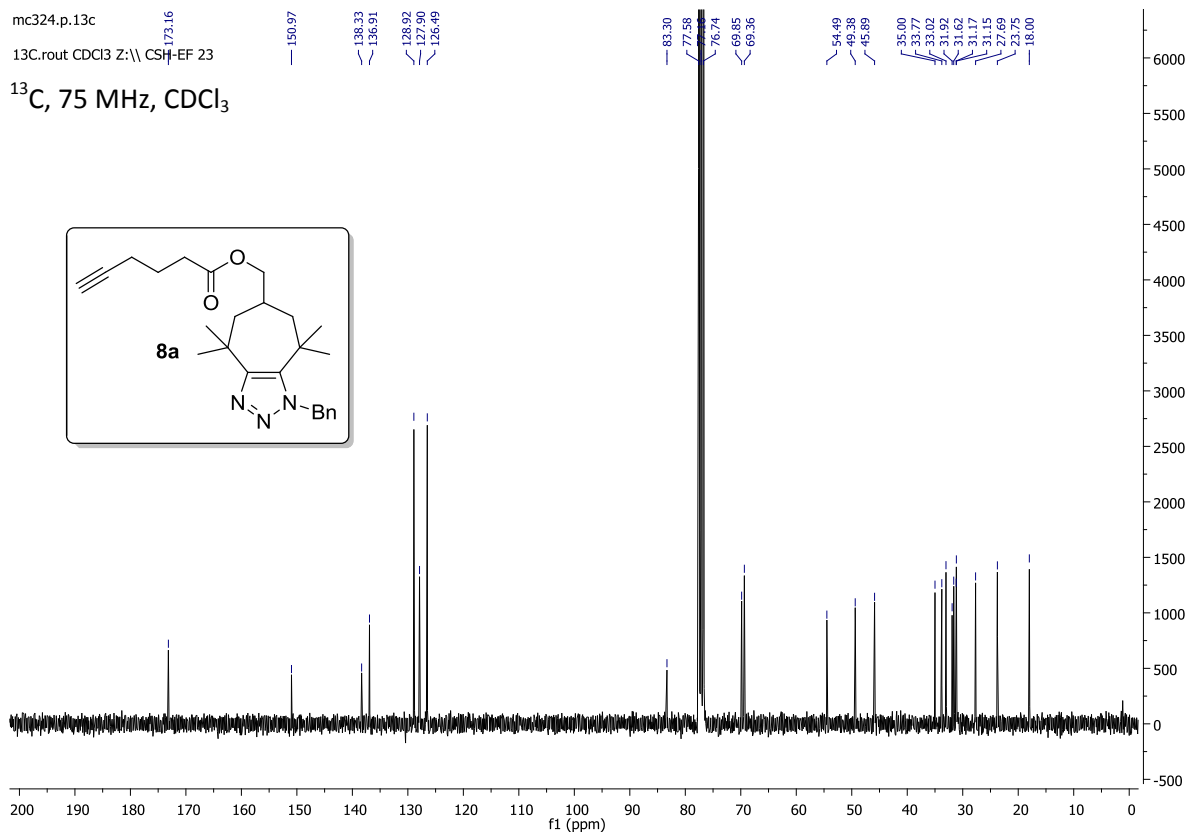



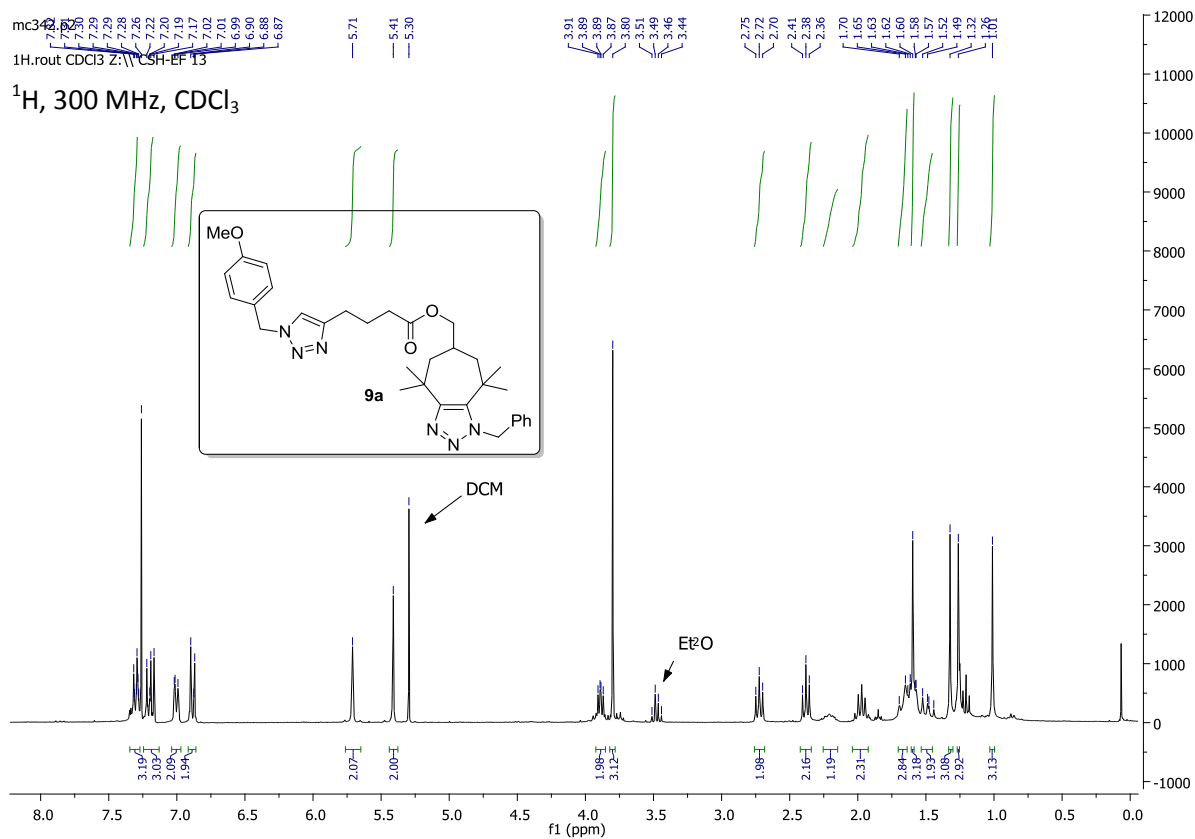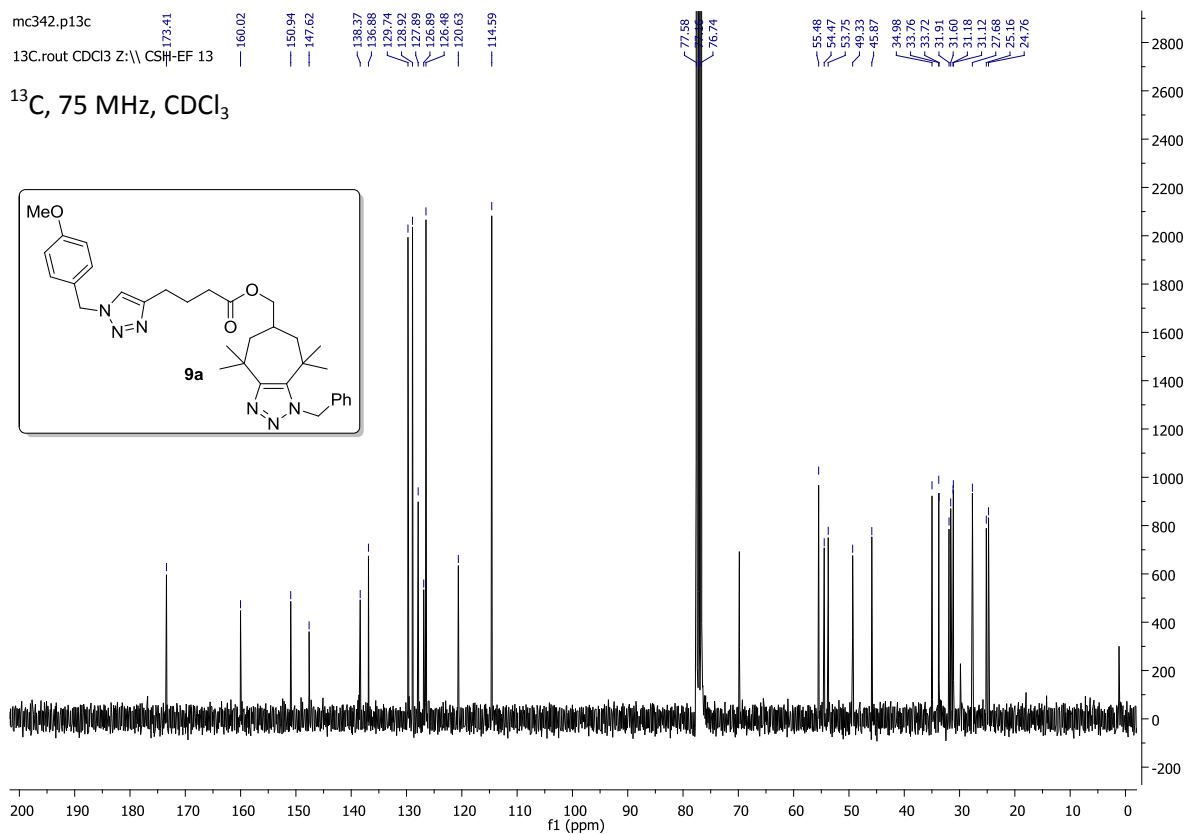

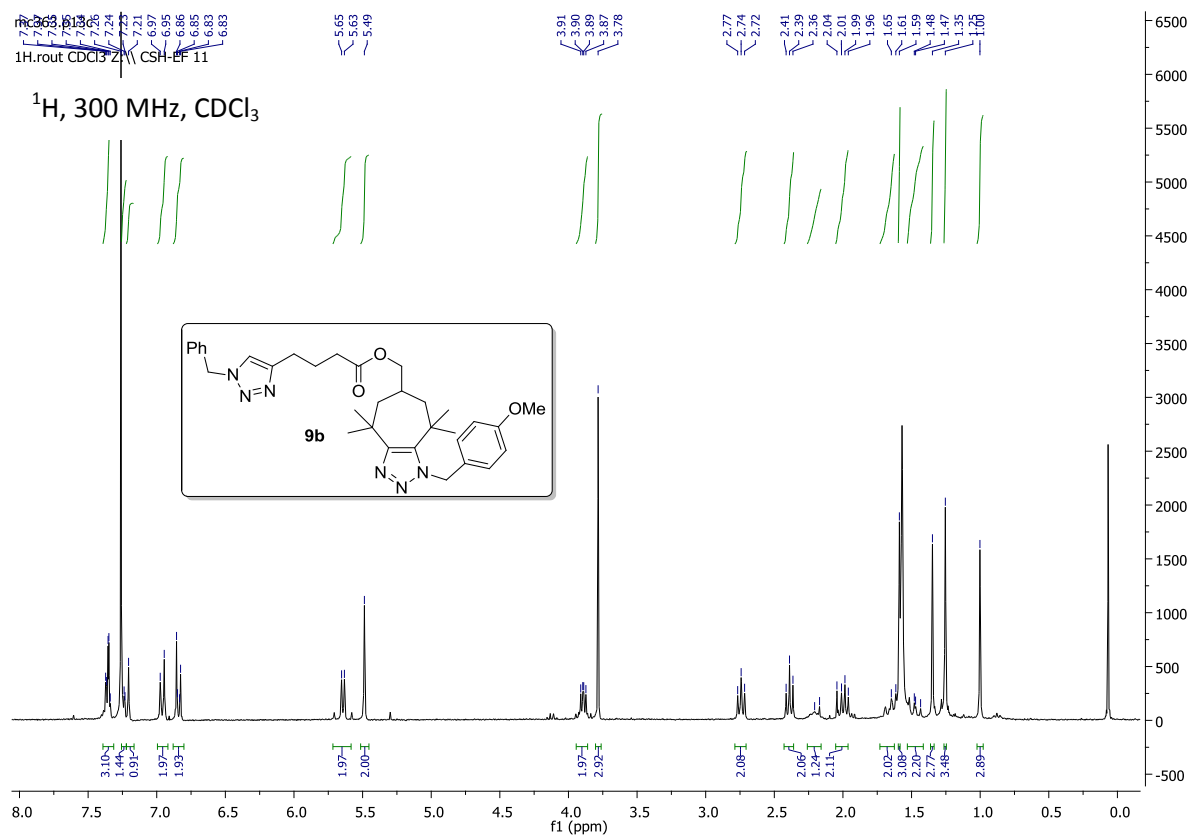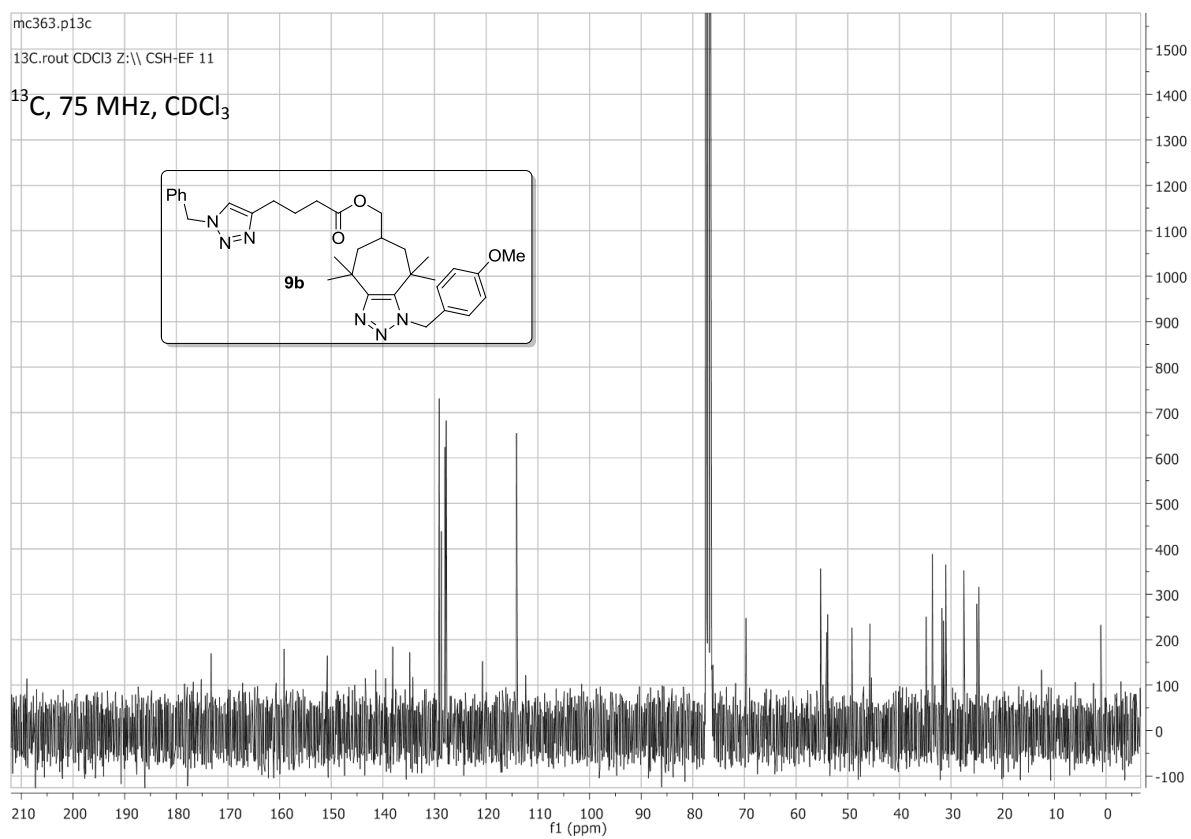





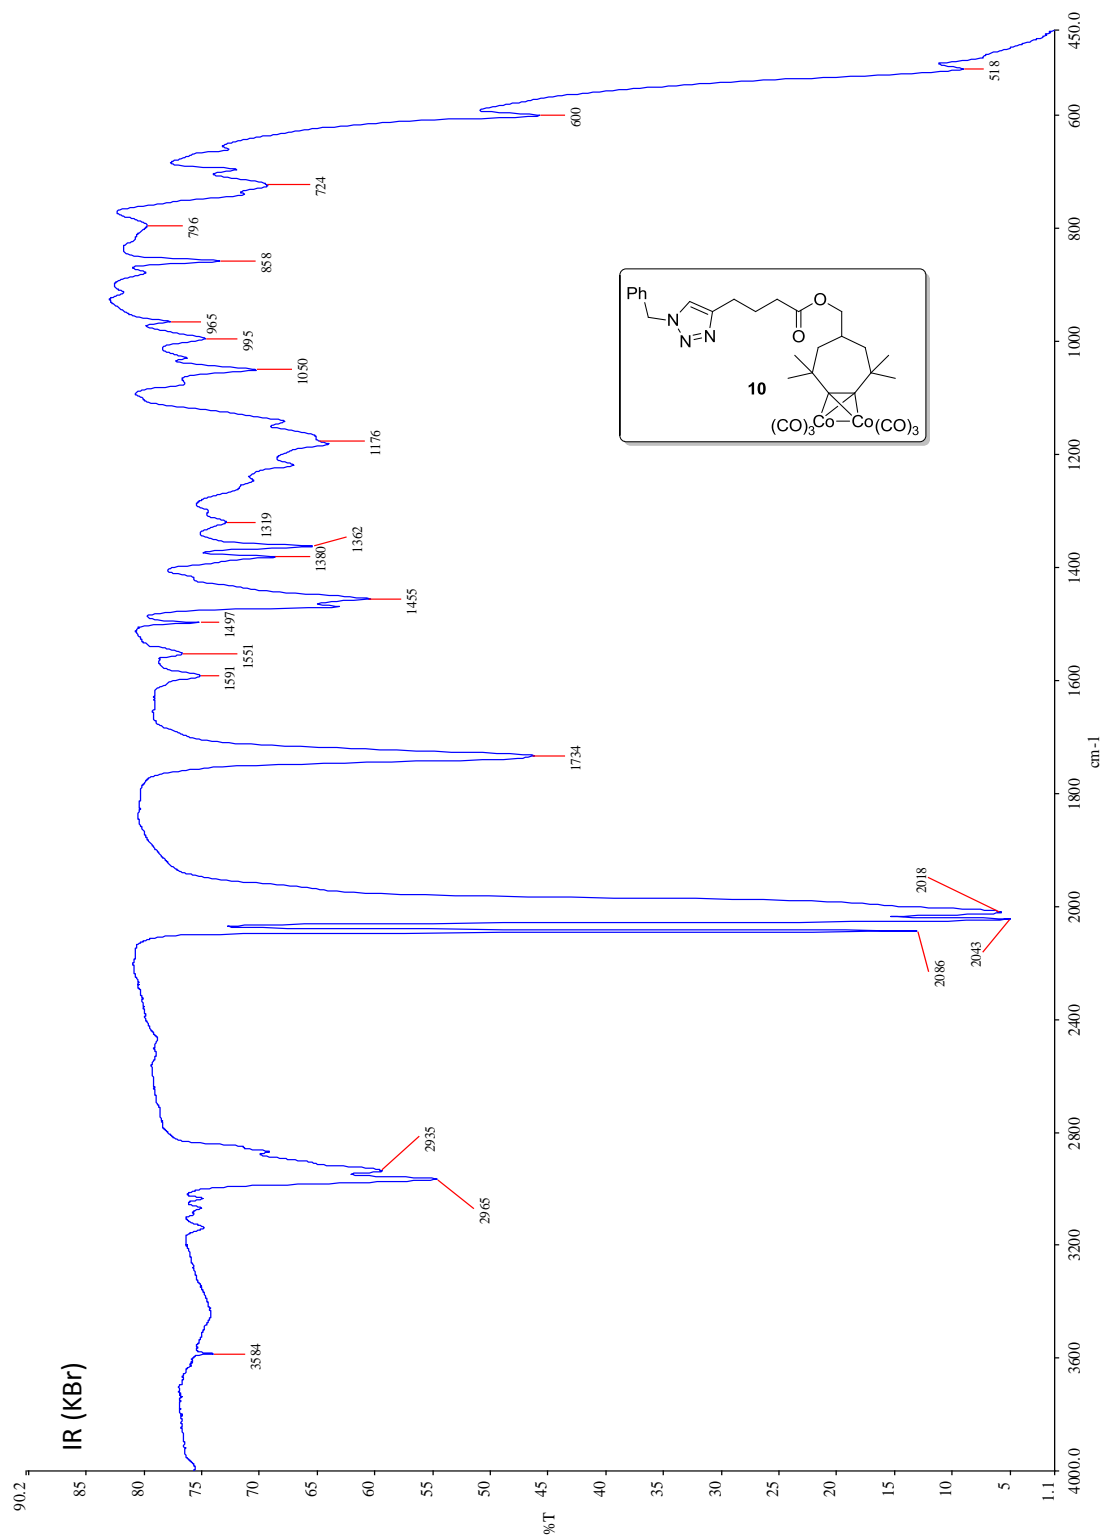

Supplement: c9qo00086k1.pdf [file c9qo00086k1.pdf]
